# Supplementary material
Source: PubMed Central journal article supplement (PMC4242014)
Supplement: NIHMS624750-supplement-1.pdf [file NIHMS624750-supplement-1.pdf]

## Supplemental Figure 1

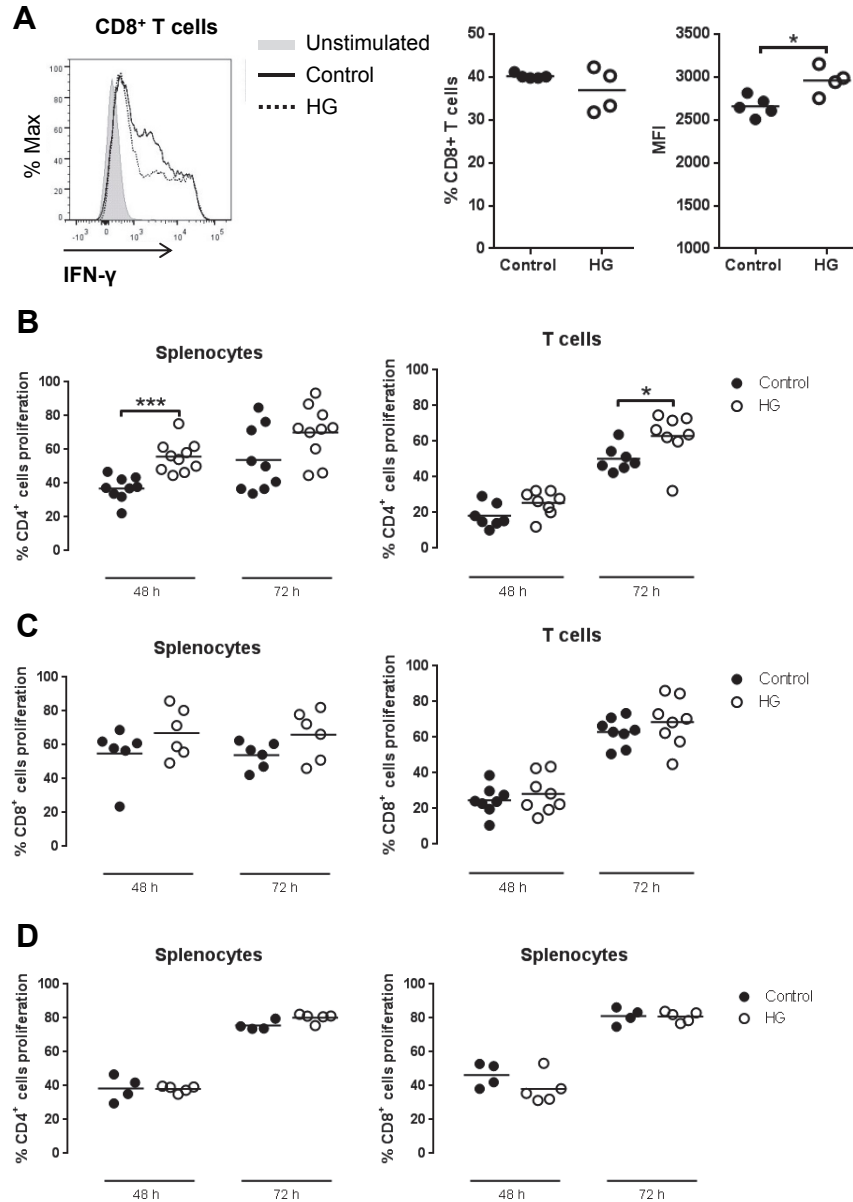

**Supplemental Figure 1. IFN- $\gamma$  production by anti-CD3 stimulated CD8<sup>+</sup> T cells and *in vitro* CD4<sup>+</sup> and CD8<sup>+</sup> T cell proliferation in control and HG mice.** **A**, Splenocytes were stimulated with plate-bound anti-CD3e (2.5  $\mu\text{g/ml}$ ) *in vitro* for 48 h and IFN- $\gamma$ <sup>+</sup> cells were measured by intracellular staining. **B**, Splenocytes or isolated T cells (negative selection by magnetic beads, >95% T cells) from spleen and lymph nodes in control or HG mice were stimulated with plate-bound anti-CD3e (2.5  $\mu\text{g/ml}$ ) *in vitro* for 48 and 72 h. Proliferation of CD4<sup>+</sup> T cells in splenocytes (left graph, n=9-10) and in T cells (right graph, n=6-8) was detected by flow cytometry and CFSE dilution. **C**, Proliferation of CD8<sup>+</sup> T cells in splenocytes (left graph, n=6) and in T cells (right graph, n=8) was detected by flow cytometry and CFSE dilution. **D**, Proliferation of CD4<sup>+</sup> (left graph) and CD8<sup>+</sup> (right graph) T cells was detected in splenocytes from acute HG mice ( $\leq 4$  wk) by flow cytometry and CFSE dilution (n=4-5). All experiments were repeated at least twice. Statistical differences were analyzed by Student's t test for each time point, \*p<0.05.

## Supplemental Figure 2

**A**

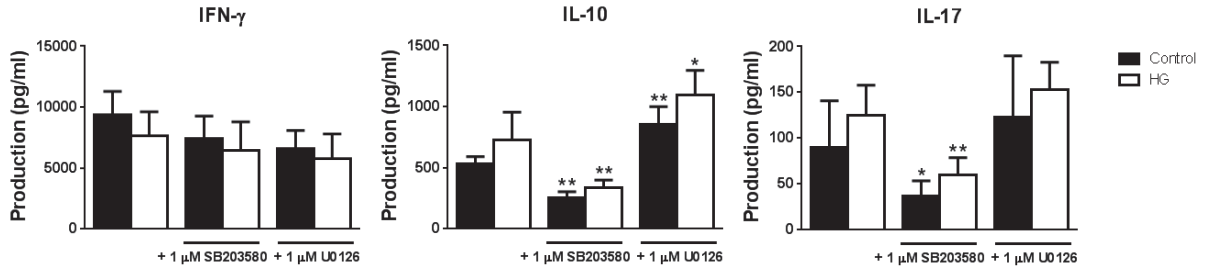

**B**

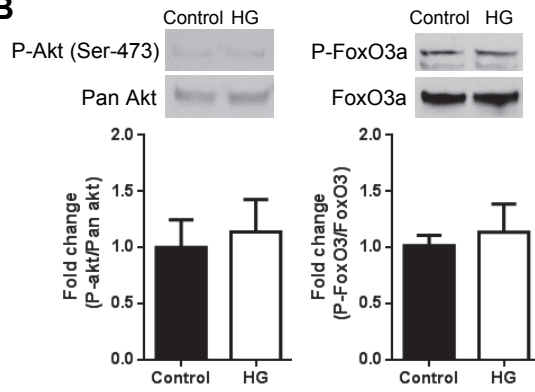

**C**

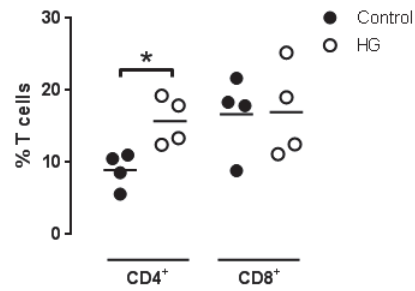

**D**

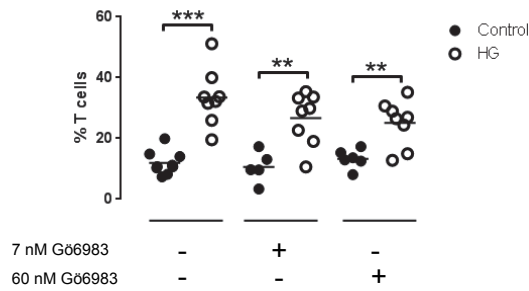

**E**

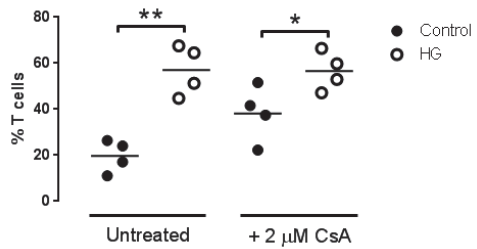

**F**

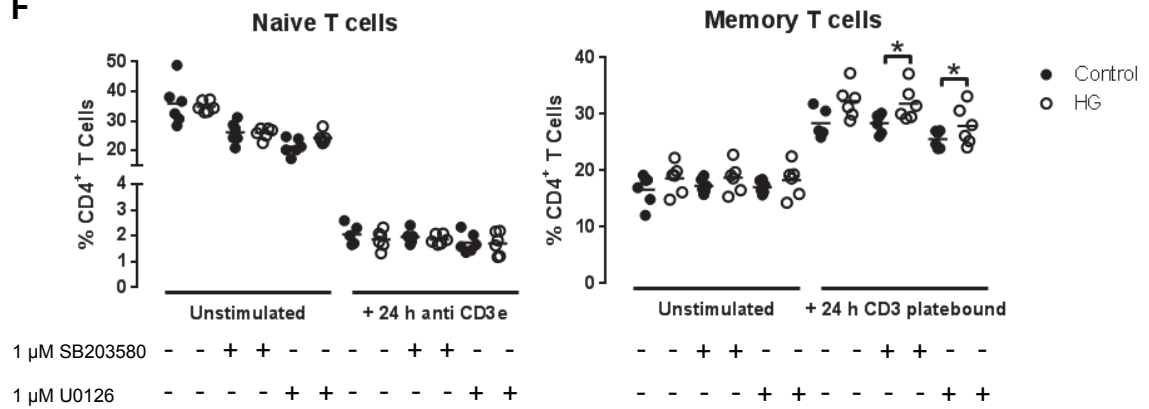

**Supplemental Figure 2. Akt signaling and chromatin decondensation in T cells. Roles for PKC and calcineurin in chromatin decondensation and MAPK signaling in cytokine production and CD44 expression.** **A**, Akt and FoxO3 phosphorylation in isolated T cells from control and HG mice (n=4-5). **B**, CD4<sup>+</sup> and CD8<sup>+</sup> T cells were isolated from control and HG mice by magnetic beads. Percentage of T cells with nuclei >6  $\mu$ m in diameter (n=4). **C**, Percentage of T cells with nuclei >6  $\mu$ m in diameter following treatment with the PKC inhibitor GO6983 at 7 or 60 nM that inhibit subunits  $\alpha$  and  $\beta$  or  $\zeta$ , respectively, for 5 h (n=5-8). **D**, Percentage of T cells with nuclei >6  $\mu$ m in diameter following treatment with 2  $\mu$ M cyclosporine A for 5 h (n=4). **E**, IFN- $\gamma$ , IL-10 and IL-17 production in splenocytes from control or HG mice stimulated with plate-bound anti-CD3e and treated or not with 1  $\mu$ M SB203580 (p38 inhibitor) or 1  $\mu$ M U0126 (ERK inhibitor). **F**, Percentage of naïve T cells, CD44<sup>+</sup>CD62L<sup>high</sup>, or memory T cells, CD44<sup>+</sup>, from control or HG mice unstimulated or stimulated with plate-bound anti-CD3e for 24 h and treated or not with 1  $\mu$ M SB203580 (p38 inhibitor) or 1  $\mu$ M U0126 (ERK1/2 inhibitor) (n=5). All experiments were repeated at least three times. Statistical differences were analyzed by Student's t test for each condition, \*p<0.05, \*\*p<0.01, \*\*\*p<0.001.

### Supplemental Figure 3

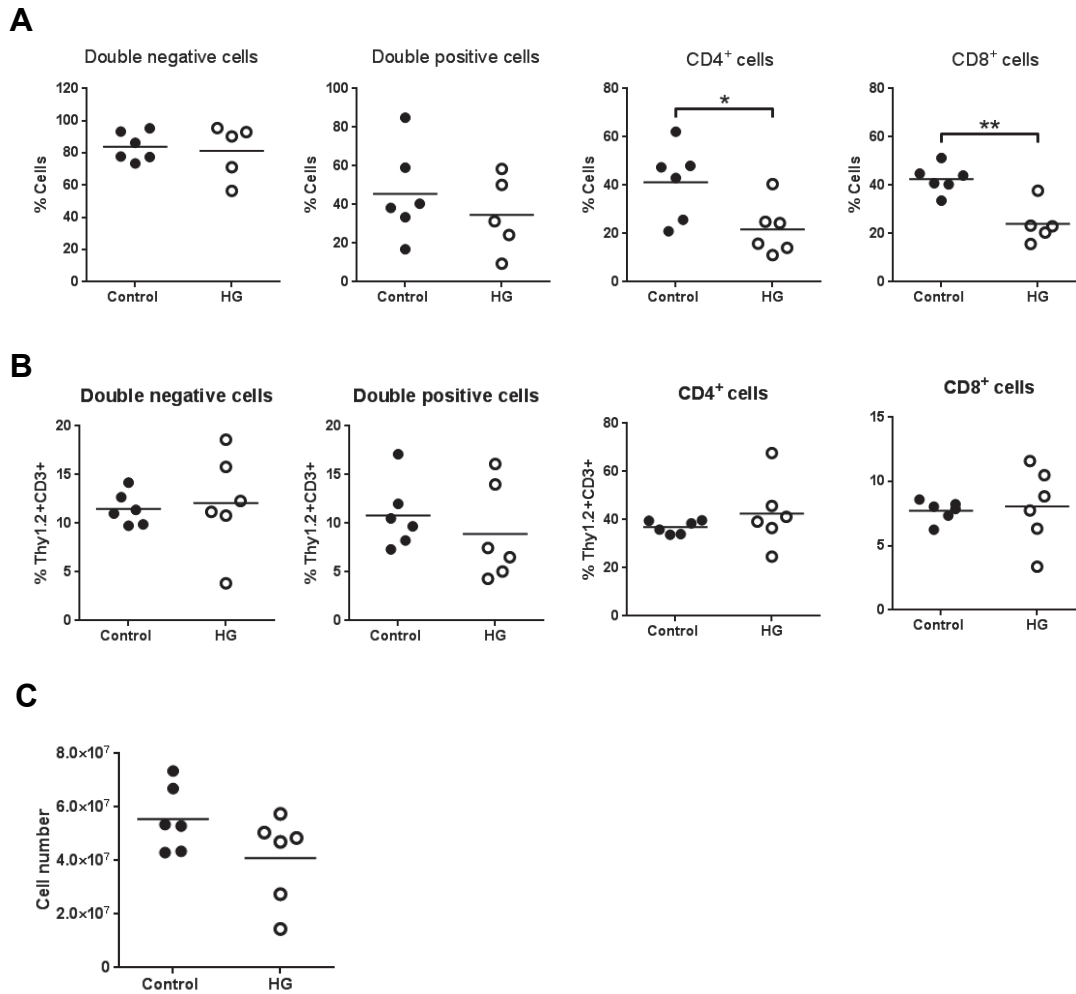

**Supplemental Figure 3. Chromatin decondensation in thymocytes and thymocyte populations and total numbers in control and HG mice.** Each population of thymocytes was sorted, cytopspined and DAPI stained. Percentage of thymocytes with nuclei  $>6.5 \mu\text{m}$  in diameter. **A**, double-negative thymocytes, double-positive thymocytes, CD4<sup>+</sup> thymocytes, CD8<sup>+</sup> thymocytes (n=5). **B**, Thymocytes isolated from control and HG mice were counted and stained for Thy1.2, CD3, CD4 and CD8. Percentage of double-negative cells (CD4<sup>-</sup>CD8<sup>-</sup>), double-positive cells (CD4<sup>+</sup>CD8<sup>+</sup>) and single-positive cells (n=5). **C**, total thymocytes number (n=5). All experiments were repeated at least twice. Statistical differences were analyzed by Student's t test.

## Supplementary Figure 4

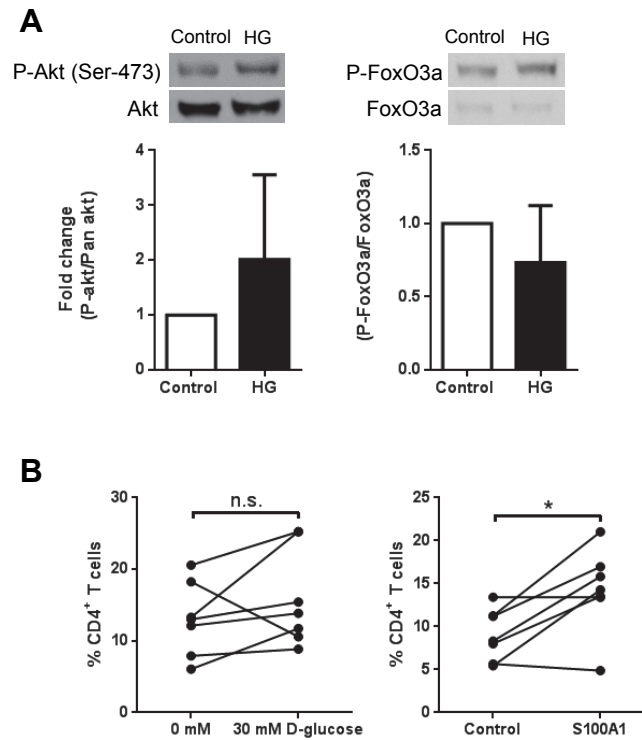

**Supplemental Figure 4. Akt signaling in RAGE<sup>-/-</sup> mice and role of glucose and S100A1 roles in the nucleus decondensation *in vitro*.** **A**, Basal Akt and FOXO3 phosphorylation was measured in isolated T cells from control and HG mice RAGE<sup>-/-</sup> mice (n=4). **B**, Isolated CD4<sup>+</sup> T cells were treated with 30 mM D-glucose or 100 ng/ml S100A1 for 5 h and nuclei size was measured. Percentage of T cells with nuclei >6 μm in diameter (n=6). Statistical differences were analyzed by Student's t test, \*p<0.05.
